# Supplementary material for: pH-Responsive and pyrene based electrospun nanofibers for DNA adsorption and detection
Source: Royal Society of Chemistry journal article supplement (doi:10.1039/c6ra26714a), 2017-01-01
Supplement: c6ra26714a1.pdf [file c6ra26714a1.pdf]

**Electronic supplementary material for:**

**pH-Responsive and Pyrene Based Electrospun Nanofibers  
for DNA Adsorption and Detection**

*Cheng-Ting Yeh, Ching-Yi Chen\**

Department of Chemical Engineering, National Chung Cheng University, Chia-Yi

County, 62102, Taiwan

---

\*. To whom should be in correspondence

Tel: +886 5 272 0411 Ext 33409.

E-mail address: [chmcyc@ccu.edu.tw](mailto:chmcyc@ccu.edu.tw). (C-Y Chen)

---

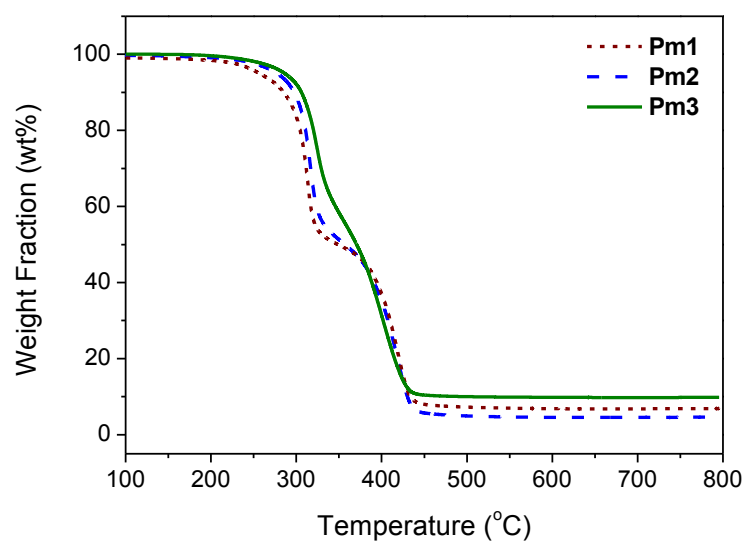

**Fig. S1** TGA curves of **Pm1 – Pm3** copolymers at a heating rate of 10 °C/min under nitrogen atmosphere.

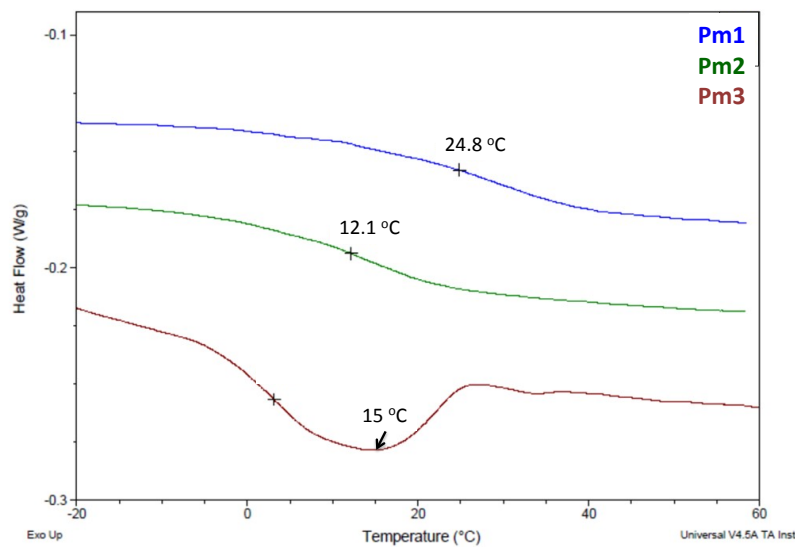

**Fig. S2** DSC curves of **Pm1 – Pm3** copolymers at a heating rate of 5 °C /min under nitrogen atmosphere.

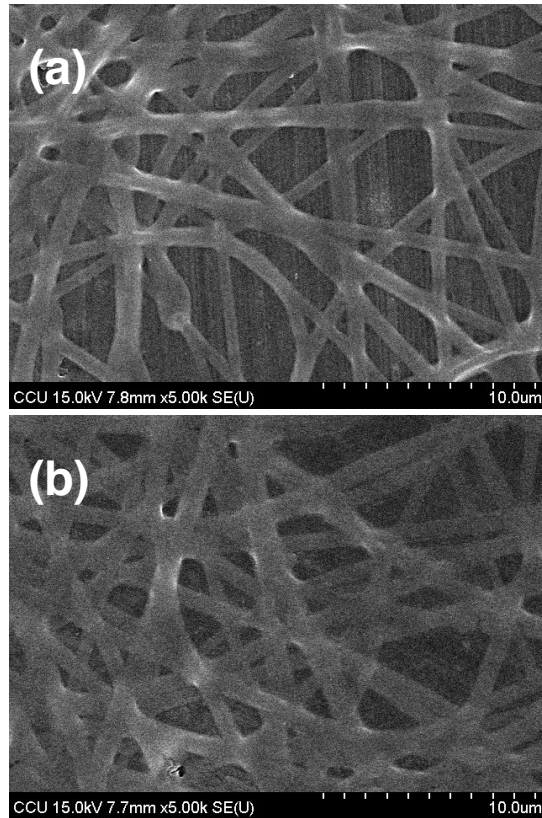

**Fig. S3** FE-SEM images of **Pm3** ES fibers immersed in pH 5 solution at room temperature for (a) 3 min, and (b) 10 min.

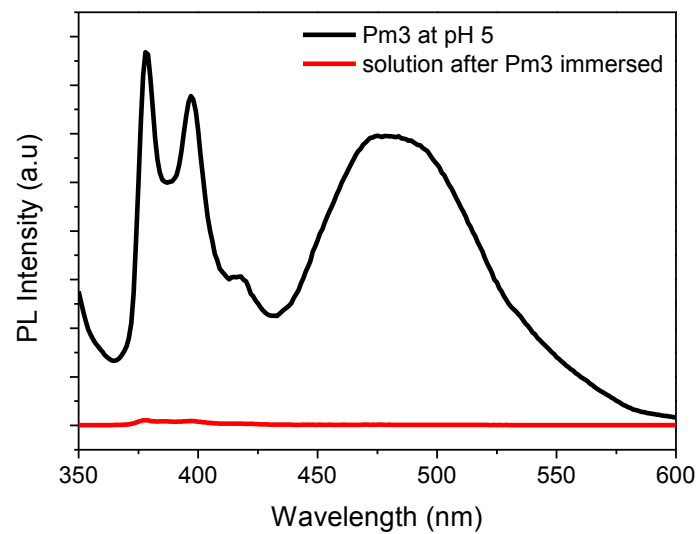

**Fig. S4** Photoluminescence spectra of **Pm3** ES nanofibers at pH 5 (black) and aqueous solution after **Pm3** immersed for 10 min (red).

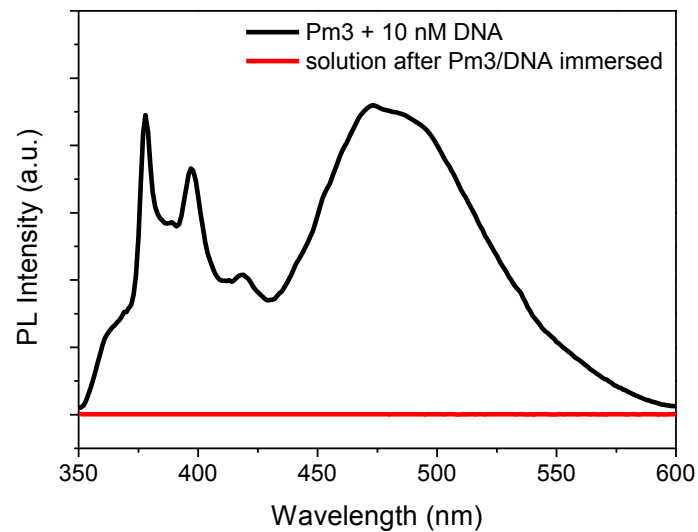

**Fig. S5** Photoluminescence spectra of **Pm3** ES nanofibers/DNA complex at pH 5 (black) and aqueous solution after **Pm3/DNA** immersed for 10 min (red).
